# Supplementary material for: Colloidal synthesis of SnS nanocrystals with dimension-dependent photoelectrochemical properties
Source: Royal Society of Chemistry journal article supplement (doi:10.1039/c9nj00506d), 2019-01-01
Supplement: c9nj00506d1.pdf [file c9nj00506d1.pdf]

## Electronic Supplementary Information (ESI)

### Colloidal synthesis of SnS nanocrystals with dimension-dependent photoelectrochemical properties

Yuxuan Wu<sup>a</sup>, Tingcha Wei<sup>a</sup>, Xiaoqiang An<sup>\*,b</sup>, Li-Min Liu<sup>\*,c</sup>

<sup>a</sup> Beijing Computational Science Research Center, Beijing 100193, China.

<sup>b</sup> Center for Water and Ecology, State Key Joint Laboratory of Environment Simulation and Pollution Control, School of Environment, Tsinghua University, Beijing 100084, China.

E-mail: xqan@mail.tsinghua.edu.cn

<sup>c</sup> School of Physics, Beihang University, 100191, China.

E-mail: limin.liu@buaa.edu.cn.

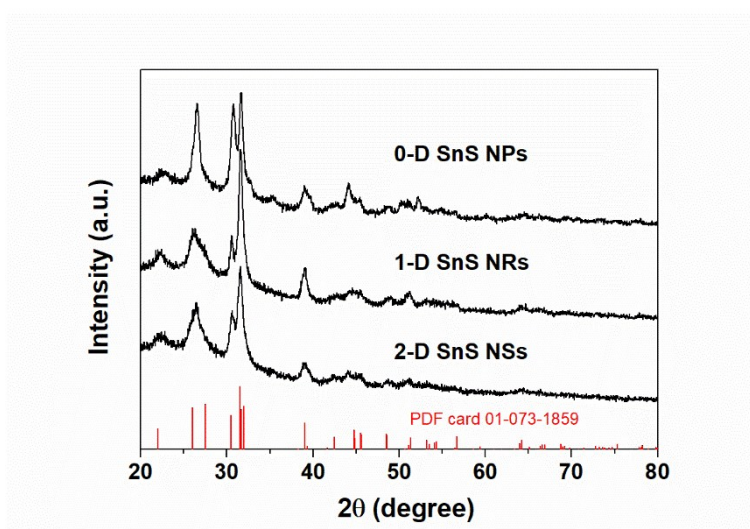

**Figure S1.** XRD patterns of the as-obtained 0-D SnS NPs, 1-D SnS NRs and 2-D SnS NSs.

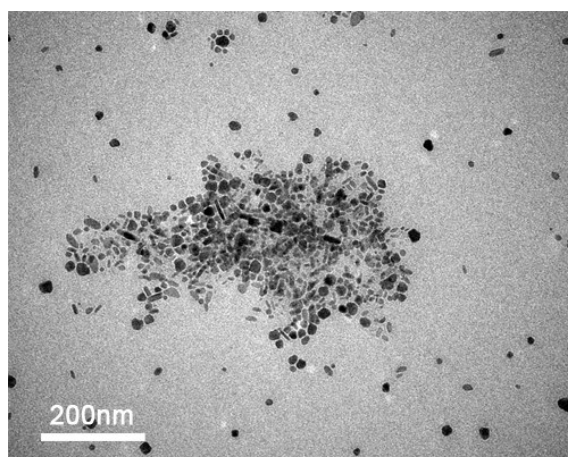

**Figure S2.** TEM image of inhomogeneous SnS NPs synthesized in the absence of DDT.

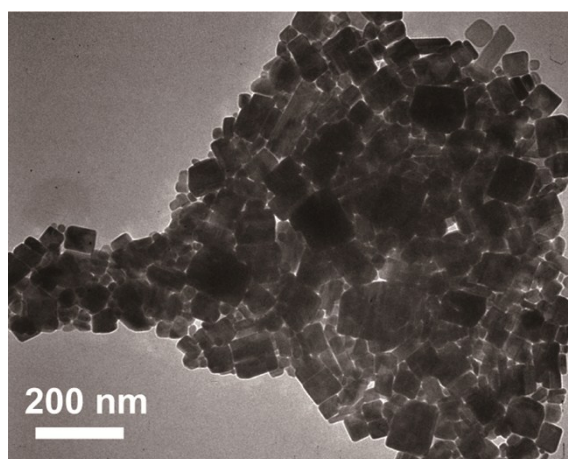

**Figure S3.** TEM image of inhomogeneous SnS NPs synthesized at 180 °C following the injection sequence of OAM-TAA and DDT.

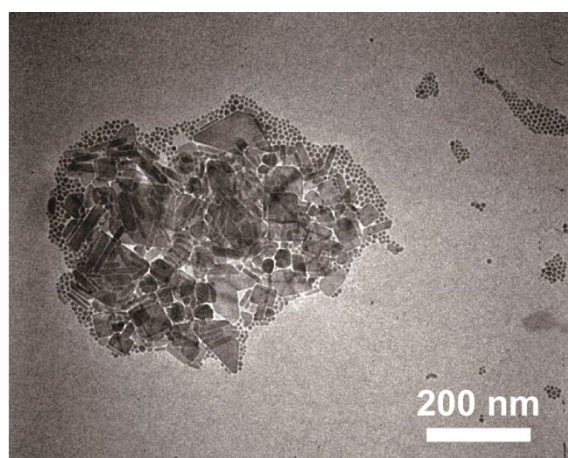

**Figure S4.** TEM image of inhomogeneous SnS nanocrystals obtained in the injection sequence of DDT and OAM-TAA at 80°C and growth temperature was set to 150 °C.

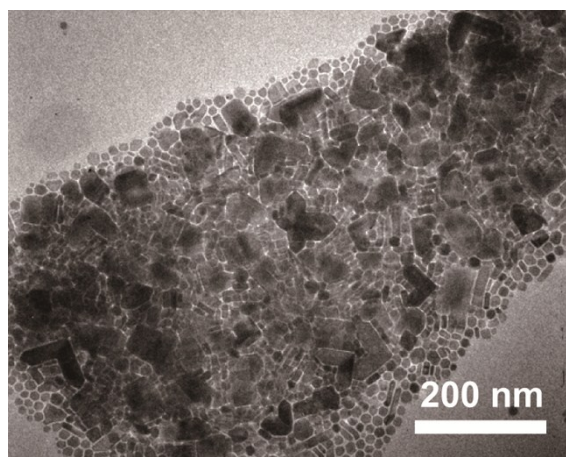

**Figure S5.** TEM image of inhomogeneous SnS nanocrystals obtained in the injection sequence of DDT and OAM-TAA at 80°C and growth temperature was set to 180°C.

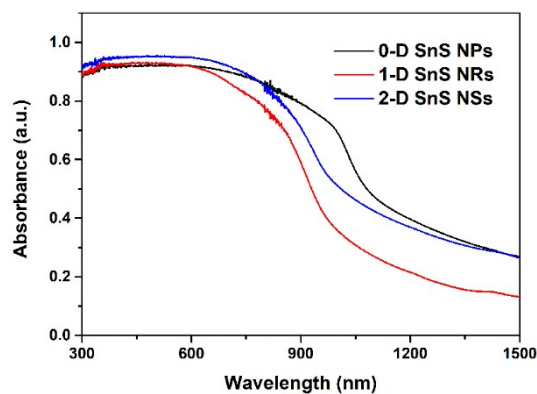

**Figure S6.** UV-vis absorption spectra of dimensional SnS NCs.

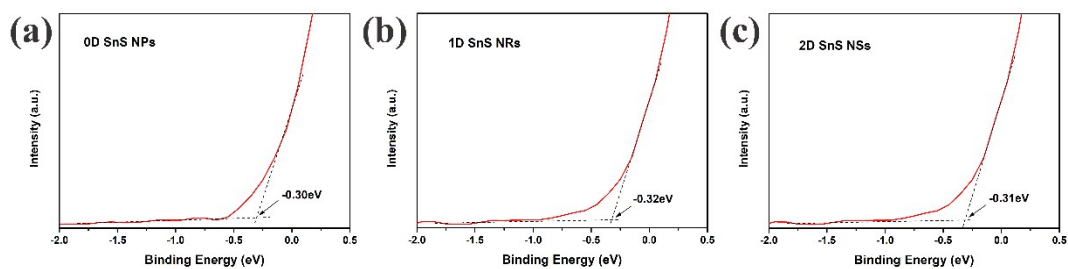

**Figure S7.** Valence-band (VB) XPS spectrum of SnS 0D NPs (a), 1D NRs (b) and 2D NSs (c) .
